# Supplementary material for: Genetic Diversity and Antimicrobial Resistance of Escherichia coli from Human and Animal Sources Uncovers Multiple Resistances from Human Sources
Source: PubMed Central journal article supplement (PMC3110821; doi:10.1371/journal.pone.0020819), 2011-06-08
Supplement: pone.0020819.s001.pdf [file pone.0020819.s001.pdf]

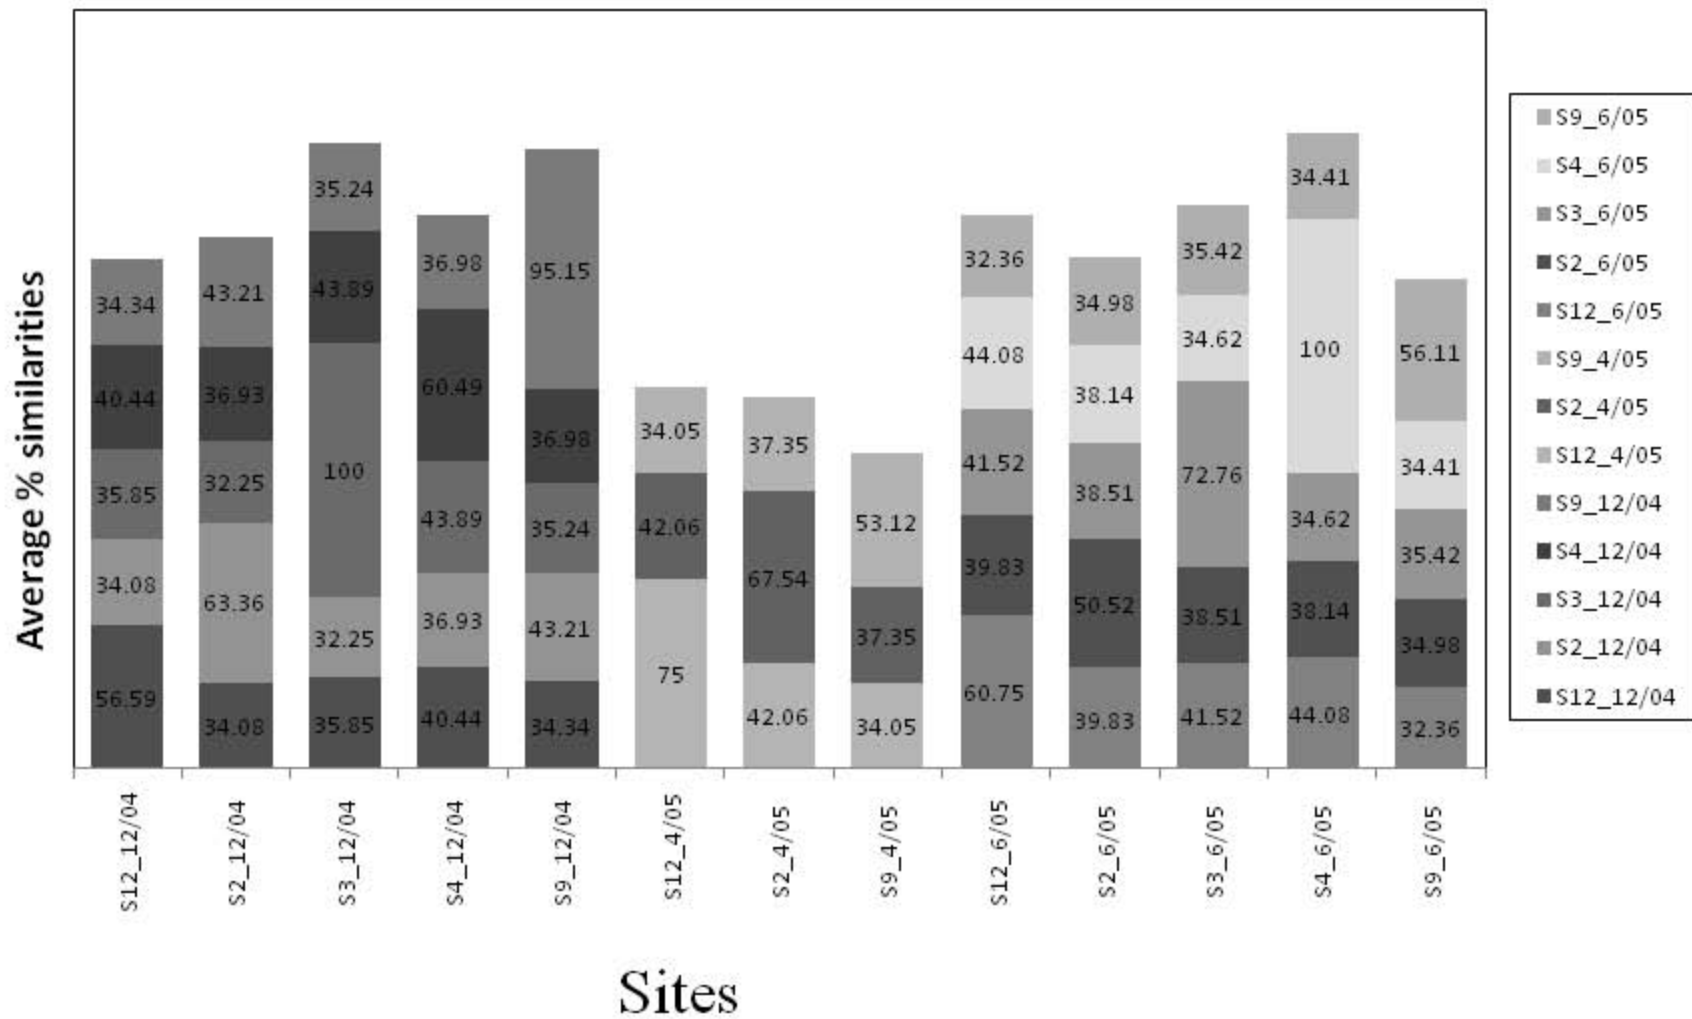





Average % similarities

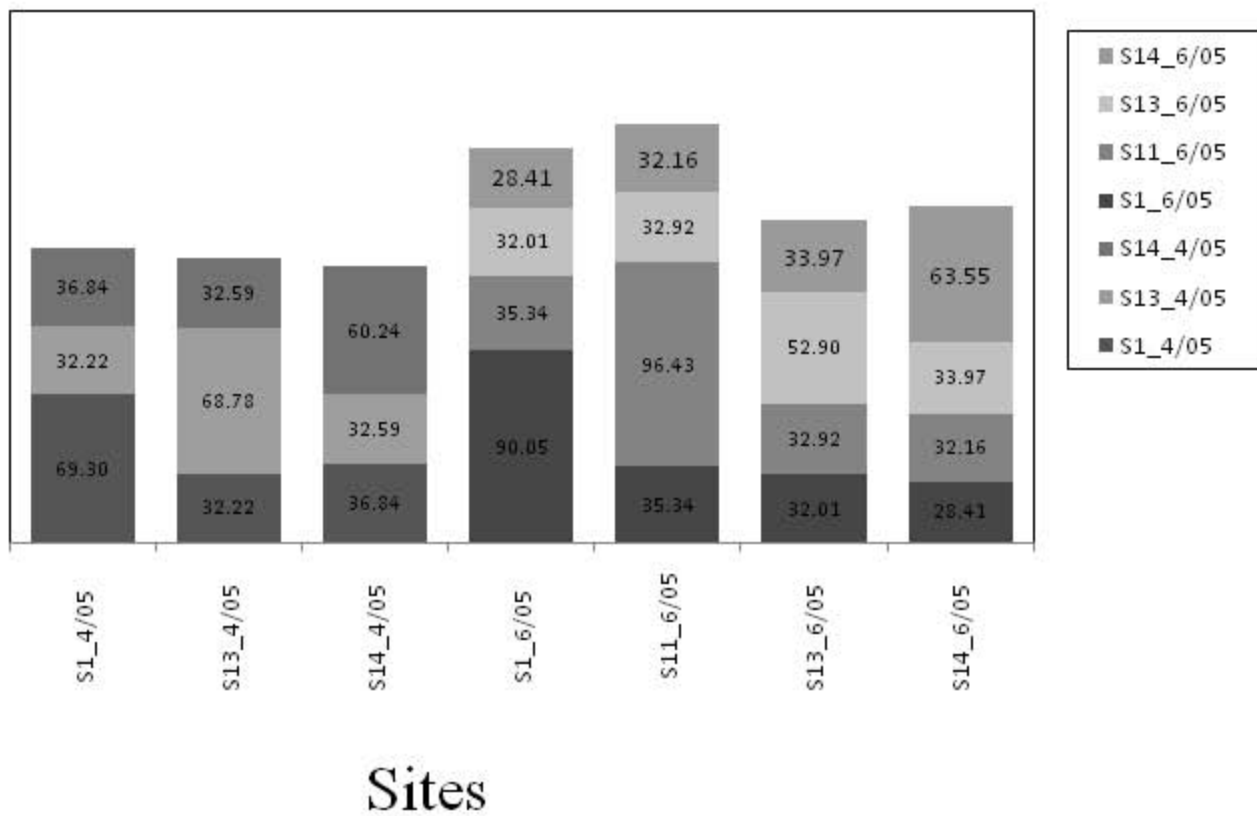

Average % similarities

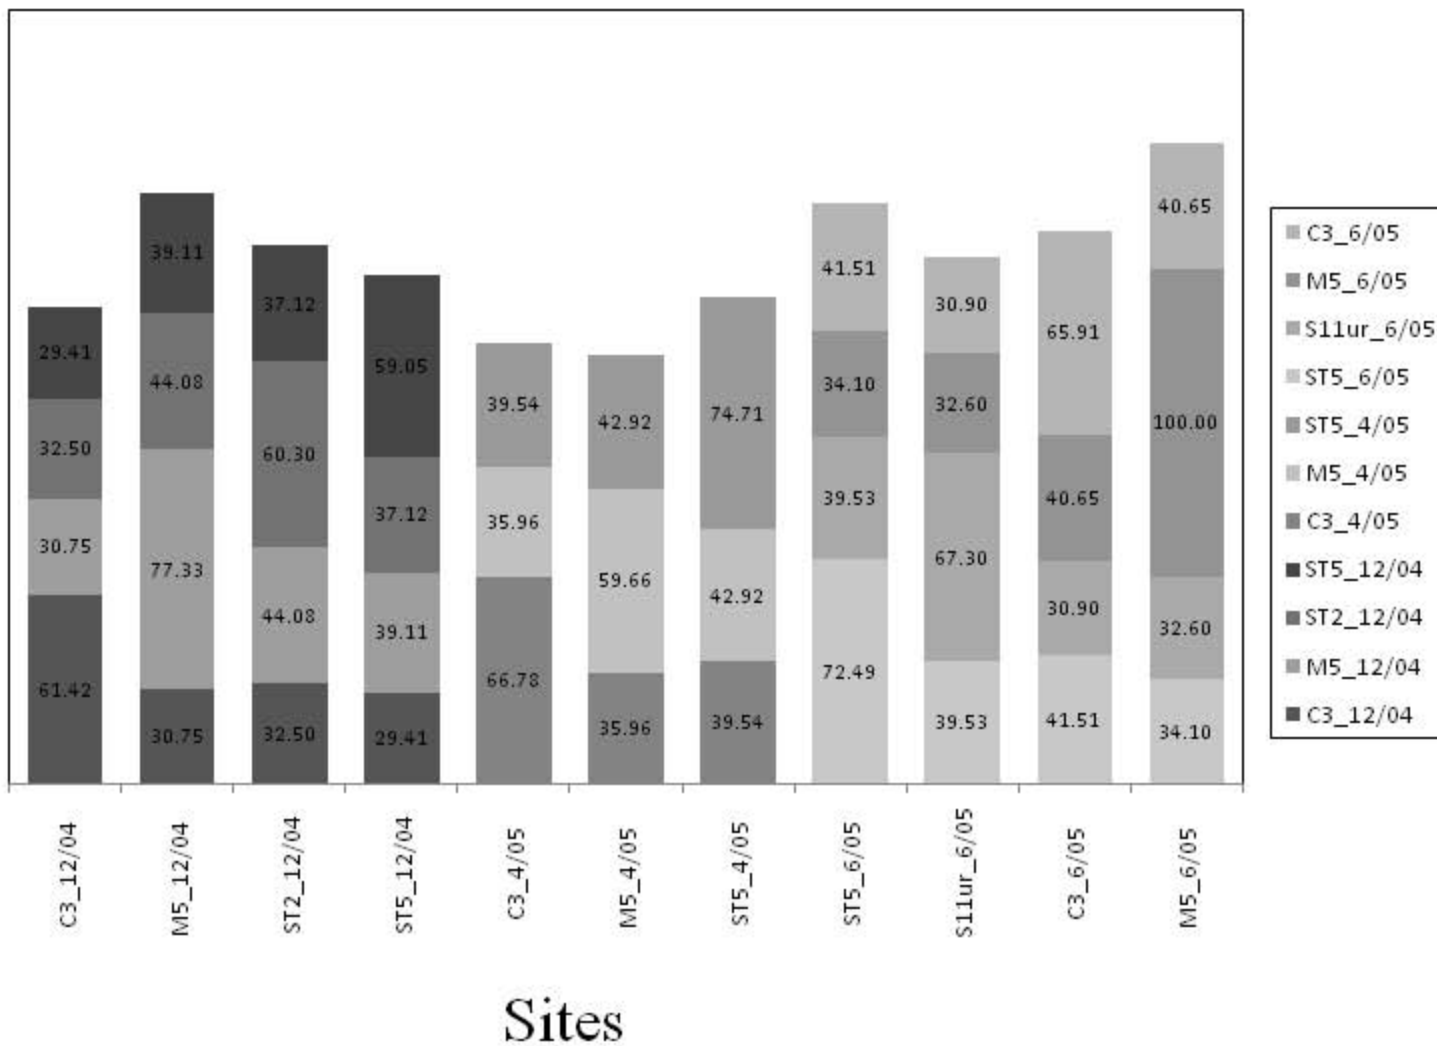

Average % similarities

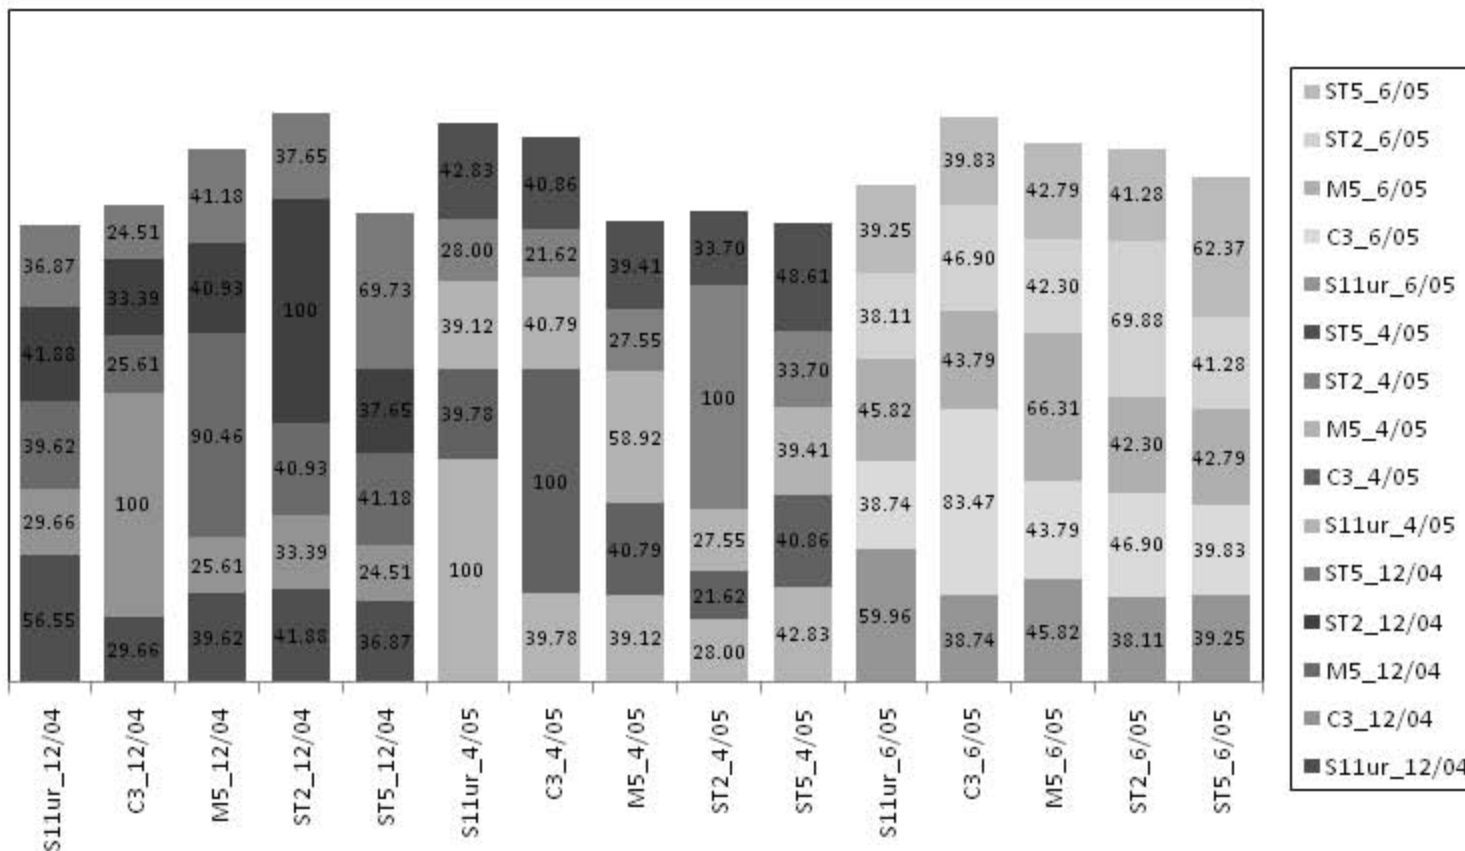

Sites
